# Supplementary material
Source: publisher site journal article supplement (http://spandidos-publications.com/5960/downloadSupplementary)
Supplement: Supplementary file 1 [file downloadSupplementary]

## Sheet: Sheet1
Table SI. Raw RT-qPCR data (Cq values) from miRNA arrays for the 10 patients included in the study (at day 0 and day 33 of the therapeutic protocol).
Well	miRNA	Day 0										Day 33
		Patient 1	Patient 2	Patient 3	Patient 4	Patient 5	Patient 6	Patient 7	Patient 8	Patient 9	Patient 10	Patient 1	Patient 2	Patient 3	Patient 4	Patient 5	Patient 6	Patient 7	Patient 8	Patient 9	Patient 10
A01	hsa-let-7a-5p	22.4056	21.5247	24.5205	20.5244	20.0616	21.3424	23.1952	21.5025	23.2521	21.4579	25.8283	22.2381	24.4302	22.1948	20.8519	23.0295	22.28	23.4678	22.517	23.8787
A02	hsa-let-7b-5p	24.9128	23.8936	26.5755	20.9962	21.4019	23.2579	26.0336	23.8013	21.7292	23.9184	26.3759	23.2695	26.4544	23.9746	22.7271	25.6448	24.241	25.4551	22.6616	25.3057
A03	hsa-let-7c-5p	24.2001	23.4006	25.994	24.7924	21.1104	23.3591	25.693	22.9433	21.8622	23.3793	28.3773	22.5728	26.3354	24.2133	22.426	25.8895	23.916	25.1439	22.9987	25.4232
A04	hsa-let-7d-5p	25.1315	22.8702	26.7608	22.7324	20.6925	23.9509	26.454	22.9073	21.2261	22.9256	27.6728	23.416	27.117	24.6838	23.3035	26.5781	24.5727	26.2016	24.1019	25.8976
A05	UniSp2	22.7909	24.323	20.9204	20.9685	25.1027	25.8174	25.7178	21.3017	24.9429	24.3677	31.4251	21.1204	21.563	23.4181	21.817	23.8409	21.8717	24.1188	23.1701	23.6289
A06	hsa-miR-200a-3p	33.8683	33.257	35.604	30.5732	31.5669	34.8676	36.0658	33.5584	30.3196	33.067	Undetermined	32.011	36.1042	42.0774	33.4941	36.5831	34.217	34.9747	32.956	34.4285
A07	hsa-let-7g-5p	21.9849	22.1765	23.8061	21.4257	19.3942	22.4152	24.5177	21.4787	20.1588	22.2267	27.9053	20.5766	24.9019	23.0036	21.1196	24.3402	22.5959	23.5918	21.742	23.3007
A08	hsa-let-7i-5p	24.3498	22.7669	25.5883	20.9856	20.2769	23.4592	25.4083	22.2269	20.984	22.8417	28.5317	22.2935	25.8705	24.1523	22.0037	25.7179	23.3851	24.9685	23.2609	24.5603
A09	hsa-miR-1	32.3591	35.3968	40.4605	23.7946	33.0241	35.7659	35.5998	33.8096	34.6679	35.8369	39.7599	29.4814	35.2154	29.1741	31.5395	33.6554	32.2846	34.5946	30.9718	32.1384
A10	hsa-miR-100-5p	31.4967	32.7685	32.5774	29.6638	30.7028	36.2141	32.2279	31.5018	32.9884	33.1926	34.0141	30.5108	32.1646	34.2832	27.813	32.26	29.8771	31.5081	30.8303	37.7198
A11	hsa-let-7f-5p	23.25	22.5383	25.3684	21.6058	19.7964	22.7043	25.6589	22.2932	20.5671	22.5162	28.8492	22.7073	25.9052	23.3094	21.6915	25.1714	23.3319	25.1976	23.0197	25.2856
A12	hsa-miR-101-3p	22.7133	24.1685	24.9234	21.3081	21.5105	23.3887	25.9105	23.8357	21.6249	24.1705	29.3904	22.3506	25.5295	23.705	21.8786	25.4606	23.5972	25.0644	21.838	24.2595
B01	hsa-miR-103a-3p	24.0203	22.2852	25.9614	23.587	19.2383	22.0009	24.7109	22.5056	20.2745	22.2009	27.0293	21.3563	26.1117	23.2509	21.5276	24.9779	22.7858	24.0833	21.451	23.7689
B02	hsa-miR-106a-5p	22.4539	20.8483	24.3154	18.8148	18.1464	20.2848	23.1964	20.5363	19.3307	20.9027	27.5023	19.3525	23.5084	21.4904	19.9075	23.5737	21.18	23.5653	20.8092	22.1455
B03	hsa-miR-106b-5p	22.5778	20.791	24.6064	20.8265	18.4155	21.6111	24.2616	20.8707	19.7336	20.9241	29.5775	20.6111	24.2636	22.502	20.932	24.5734	22.4256	24.4063	21.5402	23.3646
B04	hsa-miR-107	24.7658	22.5919	26.5121	23.0223	19.9104	22.5668	25.298	23.1014	20.795	22.9661	27.3044	21.7595	26.5506	23.8978	21.949	25.4706	23.4946	24.7506	22.1571	24.4598
B05	UniSp4	29.4188	31.4275	27.7882	27.398	31.8922	32.9423	32.6192	27.9687	30.7541	31.0984	Undetermined	27.8972	28.3839	30.2058	28.5344	30.8877	28.6136	31.4375	29.0193	30.58
B06	UniSp6	21.4339	22.0114	21.7691	18.1962	22.3748	21.7976	23.0044	19.249	21.0177	22.1231	20.2669	17.6137	21.6836	20.714	18.7246	22.3247	20.535	22.1366	21.2027	20.2841
B07	hsa-miR-125b-5p	26.4684	24.7557	28.9101	26.6264	22.9757	28.955	29.2976	24.7033	25.6339	24.93	32.7107	25.3988	29.5754	29.0877	25.9158	28.391	26.7893	27.9854	27.224	28.165
B08	hsa-miR-126-3p	23.4205	20.9609	25.8299	22.4569	19.0393	26.4495	26.031	21.5827	20.4937	21.0619	26.2819	21.1703	26.7126	24.8137	23.8076	26.3877	23.8992	25.075	23.6938	23.912
B09	hsa-miR-130a-3p	28.6292	23.4432	28.8715	21.1962	19.9805	23.7663	28.5974	24.2804	21.9864	23.4771	31.671	25.5576	30.2047	26.9415	26.7444	29.9884	26.5809	28.8248	26.6767	27.9398
B10	hsa-miR-132-3p	29.739	30.4153	31.512	26.4943	26.9726	30.3237	32.4206	28.4419	27.4071	30.8006	Undetermined	28.6972	32.1147	30.8143	28.2068	32.0238	30.2444	31.116	28.7986	31.3017
B11	hsa-miR-10b-5p	33.3723	33.7315	32.6375	30.1669	32.3213	34.9417	31.6488	32.7546	32.2925	34.7508	33.5681	29.9801	33.801	31.5623	29.8576	31.6763	29.8129	30.2155	29.1996	32.8954
B12	hsa-miR-133a-3p	32.0103	34.2506	36.1945	24.7925	32.5251	35.4037	33.873	33.5544	30.4929	34.8773	33.4749	29.3504	35.7795	29.4973	31.4108	33.625	34.975	33.5645	30.6374	31.7278
C01	hsa-miR-141-3p	30.259	31.3965	32.0091	25.8027	27.9863	30.0098	32.6022	30.4197	28.8418	31.2994	32.5683	28.2089	32.7513	31.1898	29.0079	32.8707	30.2487	31.684	30.3138	29.6335
C02	hsa-miR-143-3p	27.8009	29.2351	30.7899	23.4452	24.4882	26.8369	26.6744	24.2966	26.5375	29.1892	32.4816	22.5953	26.6803	25.3811	22.2879	26.3981	24.6239	26.9522	23.2625	25.3602
C03	hsa-miR-145-5p	28.1237	29.1798	30.4956	24.3189	25.1533	26.6658	26.9072	24.2783	26.8786	29.3602	29.7928	22.8149	26.758	25.4692	22.3713	25.4895	24.3479	26.3973	23.7019	25.2001
C04	hsa-miR-146a-5p	24.4791	22.0755	25.2964	23.4855	20.0195	24.3078	27.6918	21.9531	20.4405	22.1188	29.6981	23.122	27.7002	26.1739	24.4379	27.457	25.5038	26.0572	23.8471	25.6355
C05	UniSp5	Undetermined	Undetermined	35.3659	Undetermined	38.2776	41.3471	38.0037	Undetermined	Undetermined	37.7187	Undetermined	Undetermined	36.6503	Undetermined	Undetermined	Undetermined	34.5015	36.4041	Undetermined	Undetermined
C06	hsa-miR-26a-5p	21.2651	20.287	23.6517	21.9449	18.3743	21.1113	23.7465	21.5222	23.4567	20.5678	25.7241	20.7012	24.2757	22.6909	19.5462	21.599	22.475	22.8417	20.899	20.8792
C07	hsa-miR-150-5p	20.1724	21.4821	21.7869	21.9706	18.6571	21.8663	23.1518	20.2823	19.2483	21.6045	23.6902	18.3159	23.243	22.8498	19.4963	22.3461	21.1117	21.2215	19.9551	21.2561
C08	hsa-miR-155-5p	25.4061	24.1901	26.4809	25.6948	21.3387	23.6862	27.7676	24.1847	21.2542	24.2644	27.7204	23.8569	27.3587	27.4164	24.5929	27.5444	25.6045	27.5172	25.2077	26.4858
C09	hsa-miR-15a-5p	23.6626	22.8302	26.5923	19.3746	19.0904	22.0811	25.123	21.4095	20.3357	22.8823	29.5246	20.7561	25.6857	23.1978	21.1294	24.9904	22.7812	24.8308	21.0952	23.6832
C10	hsa-miR-15b-5p	24.0069	22.1084	27.8293	18.752	19.5754	22.2476	24.2844	21.6502	20.8267	22.3574	24.9656	21.6959	25.7991	22.3774	21.2576	25.4375	22.4541	24.4034	21.321	24.4558
C11	hsa-miR-149-3p	35.6281	32.9142	36.9124	31.7129	31.8711	33.9052	36.8792	33.4228	32.5074	32.8802	Undetermined	31.688	37.7652	35.642	34.6163	37.8842	35.2299	35.9001	33.5054	36.6204
C12	hsa-miR-16-5p	20.5496	19.572	22.7673	16.7748	16.3835	19.6381	22.2935	18.9105	17.3852	19.75	24.7157	18.9663	22.6774	20.4597	18.4682	22.487	20.4505	21.8894	18.3473	21.6634
D01	hsa-miR-17-5p	22.5837	20.9637	24.5371	19.6756	18.5663	20.4855	23.0832	20.934	19.679	21.1661	27.9988	20.4254	23.6529	21.6487	20.396	23.6934	21.4073	23.6645	20.8967	22.483
D02	hsa-miR-181a-5p	23.2209	20.7436	22.9992	17.6301	18.2259	21.2827	25.6633	20.4798	18.1476	20.8213	29.5296	20.8294	24.8238	22.1808	21.8329	25.2749	23.3031	24.9248	22.9351	23.6726
D03	hsa-miR-181b-5p	26.0597	22.274	25.8969	19.8827	19.8255	23.2091	28.2511	22.7086	19.7238	22.4169	27.9095	24.475	28.3751	25.3422	24.9414	28.3029	25.9477	27.9053	26.3361	26.7353
D04	hsa-miR-182-5p	33.1475	32.8045	35.1641	29.9553	30.1551	31.7757	30.9035	31.0498	29.4476	33.5112	30.8741	27.2079	31.9019	28.4203	26.6062	30.808	29.3431	28.6952	26.9847	30.4329
D05	cel-miR-39-3p	28.9146	29.0318	28.5738	25.3588	29.5124	28.7935	30.0346	26.3393	28.295	28.8343	30.5191	25.4232	28.5498	27.8821	25.988	29.249	27.5346	28.9729	28.1918	27.1795
D06	hsa-miR-27a-3p	24.2058	24.5958	26.7418	20.029	21.111	23.3462	25.524	22.5126	22.8199	24.8677	26.955	21.2533	25.1998	24.4493	22.1414	25.5675	23.2679	25.8387	22.4469	23.7706
D07	hsa-miR-186-5p	26.4372	25.5233	28.9846	24.7553	22.8331	26.3786	28.509	25.5722	23.8858	25.6113	32.9115	25.3198	28.7556	27.6448	25.6206	28.8494	26.5889	28.5809	25.679	27.5407
D08	hsa-miR-18a-5p	26.3278	24.1004	28.5083	25.3586	21.4799	24.5117	25.8513	24.9266	22.598	24.348	30.6139	22.5765	26.7114	24.4685	23.7225	26.5829	23.8336	26.4087	23.8706	25.2025
D09	hsa-miR-191-5p	23.2209	21.2472	24.7588	22.6576	19.3366	22.5628	24.8242	21.1738	19.6879	21.4492	27.253	20.498	24.2905	23.1423	20.7705	24.2351	22.7337	24.2844	21.9089	23.2156
D10	hsa-miR-192-5p	26.6653	27.9009	28.8351	25.1777	25.4375	28.4083	28.5745	27.4515	25.7136	28.042	30.6745	24.8863	29.1376	26.7519	25.4782	29.3076	26.6293	28.4756	25.4975	27.4519
D11	hsa-miR-148a-3p	25.2655	28.9601	27.9915	21.2403	24.4517	26.4623	25.9844	23.548	24.4937	29.2391	30.8531	22.4987	26.1614	24.1424	21.6036	25.7182	23.702	26.1881	23.1569	25.2461
D12	hsa-miR-194-5p	27.1294	27.8815	28.5905	25.1496	25.1367	28.4507	29.0804	26.6728	25.5254	27.9453	31.3843	24.843	29.4503	27.7224	26.1917	29.2978	26.9918	28.1508	25.8222	27.6035
E01	hsa-miR-195-5p	28.7436	27.0465	29.7908	27.7329	23.889	33.2796	31.4841	26.2009	25.5741	27.1297	33.7995	28.7266	33.6621	31.5218	29.366	32.5331	29.8406	29.881	28.5916	30.8865
E02	hsa-miR-196a-5p	33.7188	33.9828	37.2717	27.7515	34.0272	31.0186	35.4046	37.3589	29.6632	33.5373	42.1458	32.8754	38.1096	32.8757	33.6076	34.3764	33.4431	33.4127	31.3388	35.8762
E03	hsa-miR-19a-3p	21.9696	20.0413	24.4581	17.6624	16.8628	19.3949	22.8708	20.9073	17.6479	20.1416	27.3221	19.7895	24.273	21.7671	19.882	23.6466	20.9648	22.7359	19.7343	21.8326
E04	hsa-miR-19b-3p	22.6716	20.5671	24.8157	18.5998	16.6651	19.5866	23.3045	21.4299	18.3637	20.6876	27.7855	20.6821	24.9724	22.1315	20.4322	23.9095	21.4679	22.9532	20.3869	22.4065
E05	UniSp3 IPC	18.4112	18.9163	18.3249	15.2701	18.4783	18.0955	17.7601	16.9728	17.2207	19.234	15.8277	14.8153	18.1555	17.7676	16.0191	18.471	16.8981	18.0879	17.3143	17.3061
E06	hsa-miR-200b-3p	31.6774	31.236	33.4198	28.7166	29.2098	32.355	34.4386	29.7572	28.1809	31.2224	39.5168	29.3124	33.3087	32.1045	29.942	33.1452	31.2632	32.1649	30.1894	31.6237
E07	hsa-miR-200c-3p	28.8626	29.9654	30.1123	24.9832	27.1776	29.2547	31.3647	28.2088	27.3679	30.1192	29.8619	26.797	30.3002	29.5227	26.8453	30.4003	28.9502	30.4931	27.8678	28.9549
E08	hsa-miR-202-3p	35.6243	39.0042	42.0645	33.5955	36.4635	Undetermined	Undetermined	34.3789	42.1005	37.5741	35.9647	42.1565	42.0795	Undetermined	42.134	39.4918	34.7645	Undetermined	Undetermined	42.1345
E09	hsa-miR-10a-5p	37.4326	40.9852	39.896	33.4333	34.6222	36.7573	37.0446	36.6129	36.4222	39.8023	39.5675	35.2252	38.7295	36.7673	32.6502	35.8547	33.4422	35.7147	33.678	37.384
E10	hsa-miR-205-5p	38.0174	36.8477	36.7827	42.2163	38.8724	Undetermined	Undetermined	Undetermined	35.5037	37.2669	Undetermined	Undetermined	Undetermined	41.2268	Undetermined	39.7917	33.7358	Undetermined	38.6114	Undetermined
E11	hsa-miR-206	42.0466	Undetermined	41.5892	34.3077	40.5443	38.5614	41.494	42.045	Undetermined	39.5631	37.4736	31.7655	Undetermined	39.1907	Undetermined	Undetermined	42.1135	Undetermined	42.1054	37.8383
E12	hsa-miR-20a-5p	21.5409	20.1432	23.5903	17.8428	17.652	19.6075	22.6558	19.9232	18.5098	20.4308	27.1209	18.8528	22.8185	21.0924	19.21	23.0916	20.3339	22.9685	19.8294	21.5947
F01	hsa-miR-20b-5p	29.9391	26.6489	31.5173	24.0522	23.6656	26.7743	30.8478	26.2482	24.977	26.8924	37.8167	27.6486	31.4868	28.8755	27.9928	31.817	28.9261	30.9035	27.824	30.3623
F02	hsa-miR-21-5p	21.3405	21.6734	22.459	18.5513	18.5771	19.9803	23.8387	20.89	19.6106	21.762	22.3008	18.5625	23.4465	22.3788	19.6222	23.3455	21.7787	22.0439	19.5403	21.2872
F03	hsa-miR-210-3p	27.0171	23.4354	29.5532	24.015	21.9449	28.9626	30.2135	24.8079	23.4933	23.5437	32.7206	25.9732	30.6827	27.5999	26.6922	30.1931	27.629	29.4053	26.9765	28.65
F04	hsa-miR-214-3p	35.6163	32.0751	33.2326	31.3689	32.3095	33.5286	33.7745	31.851	25.2904	32.4698	32.8833	30.8012	34.4097	32.6311	29.847	32.6425	30.7165	30.5455	30.5925	34.9368
F05	hsa-miR-215-5p	27.3321	28.3274	29.694	25.95	26.0901	28.8698	29.2643	27.467	26.2621	28.3415	30.7286	25.6246	29.9136	27.238	25.9155	29.6545	27.2271	28.7818	25.9966	28.1684
F06	SNORD38B	26.6151	22.9063	28.1272	25.7261	19.7987	23.5103	26.4645	25.2174	20.8459	22.9551	25.278	24.5845	29.3213	25.181	23.3548	25.6635	23.7251	23.8537	26.724	26.7627
F07	hsa-miR-22-3p	26.5096	29.4201	27.5096	23.8066	25.2426	27.9441	28.1563	25.1852	26.4107	29.4943	31.7894	23.8272	27.6273	25.9276	24.4651	26.8266	25.514	26.5349	24.7151	26.5527
F08	hsa-miR-221-3p	27.001	25.8286	27.3423	23.4338	23.5353	25.7529	27.3326	24.7879	24.7698	26.1489	28.9496	23.4946	28.338	26.2261	24.1885	27.3301	25.1285	26.6337	25.5681	26.539
F09	hsa-miR-222-3p	25.5142	23.3863	25.9863	22.1979	20.4696	24.648	27.7841	23.9204	21.4844	23.5101	30.9071	23.8311	28.8615	26.4073	24.2627	27.9454	25.4847	27.0221	24.4057	26.5439
F10	hsa-miR-223-3p	20.5161	22.452	23.9577	16.3336	17.6942	19.4928	20.8777	17.5058	18.9881	22.532	23.3936	16.5668	20.4543	18.9538	15.9787	20.1769	18.895	20.6795	16.6107	18.7339
F11	U6 snRNA	31.3367	26.7919	33.754	27.3634	25.8807	29.0853	29.2141	26.7819	26.231	26.5423	30.6452	28.7977	33.4423	27.9251	27.2272	29.0349	26.9308	27.7057	28.2408	30.6514
F12	hsa-miR-23a-3p	22.9522	23.2539	25.7888	19.5987	20.4924	22.5741	24.4667	21.2073	21.9724	23.39	23.7545	20.2332	24.1802	23.0867	20.3757	24.1486	22.4916	23.9751	20.9257	22.7518
G01	hsa-miR-23b-3p	25.66	25.2166	28.3086	22.2454	22.5506	24.3664	26.4418	23.2744	23.7278	25.288	25.7398	22.2756	26.3261	25.2615	22.5702	26.5526	24.5667	26.0479	23.2012	24.7661
G02	hsa-miR-24-3p	24.9835	24.0821	27.4005	21.6546	20.5752	23.9273	26.1985	22.9546	22.2336	24.152	28.1511	21.4755	26.7374	24.7963	21.9243	25.7354	24.1596	25.3172	22.583	24.3704
G03	hsa-miR-25-3p	22.684	20.8319	24.1219	19.4714	18.404	21.3608	24.3524	20.2331	19.5568	20.9803	25.4013	19.9208	23.6818	22.4474	20.5628	24.0008	22.0066	23.66	21.4169	22.7817
G04	UniSp3 IPC	18.4192	18.9009	18.3071	15.3391	18.256	18.9806	17.6117	16.988	17.2336	19.2529	15.8408	14.1872	18.2	17.891	16.7662	18.6796	16.8951	17.9869	17.2577	17.2937
G05	hsa-miR-26b-5p	22.6377	22.519	25.325	22.1774	20.027	23.1664	25.4571	22.2851	21.0948	22.9407	28.1871	20.8994	25.4497	23.5973	21.4465	25.2122	23.5153	24.4622	21.7334	23.8296
G06	UniSp3 IPC	18.4033	18.902	18.2824	15.3531	18.2647	18.0727	17.6945	16.628	17.2964	19.1425	15.5303	14.6162	17.9913	17.9983	16.1753	18.6838	17.142	17.9817	17.3418	17.3198
G07	hsa-miR-27b-3p	25.6545	25.6449	28.4321	21.5105	22.542	24.3238	26.8044	23.8251	23.8031	25.7791	28.1827	21.9743	26.5141	25.6681	23.3402	27.0805	24.6795	27.1167	23.6734	24.9392
G08	hsa-miR-29a-3p	23.356	24.8688	25.2115	21.7816	22.4182	25.1527	26.1344	23.6755	23.6855	24.9245	29.8717	21.7406	26.4878	24.5247	22.4943	25.2857	23.8023	24.761	22.8242	24.2999
G09	hsa-miR-29b-3p	26.2688	28.4792	29.1572	24.8955	25.276	28.4459	29.1234	26.9584	25.8155	28.6044	33.3069	23.6727	30.0024	27.8128	25.2217	28.637	26.5595	28.0196	24.889	27.3531
G10	hsa-miR-29c-3p	22.7994	24.2555	25.149	20.6838	21.362	23.8418	25.2536	23.2999	22.3265	24.3215	29.6125	21.347	26.2471	23.8448	21.7146	24.881	23.2086	24.4522	22.0216	23.9399
G11	hsa-miR-30b-5p	24.9365	21.9839	26.5258	24.3281	20.3796	23.1979	26.9892	24.3925	20.5675	22.0242	28.2501	22.2654	27.7828	25.0151	23.5092	26.7399	24.8753	25.4977	23.6577	24.9639
G12	hsa-miR-30c-5p	25.6065	23.1157	27.9479	22.6111	21.1396	23.5996	27.3436	23.938	21.6604	23.2875	28.2295	23.5478	27.5612	25.3994	23.2598	26.9615	25.2073	25.7924	23.5032	25.8813
H01	hsa-miR-30d-5p	26.3357	23.6747	27.6956	23.5573	21.0939	24.2889	27.5724	23.4445	21.9542	23.8016	28.4141	23.3096	27.8295	26.2545	23.8423	26.9936	24.8168	26.5624	24.6097	25.9348
H02	hsa-miR-31-5p	29.2917	29.9413	31.4371	30.2467	29.1784	30.7835	33.028	29.8167	29.6906	30.0013	31.7472	26.6778	32.8018	33.2895	28.8558	31.1782	30.9451	30.7601	30.1733	30.1283
H03	hsa-miR-34a-5p	30.0432	27.3545	30.8645	25.9816	22.9171	31.9107	28.9174	25.6005	25.974	27.4903	32.6208	25.173	30.1539	27.3192	24.5892	28.302	26.5521	29.2958	26.3053	27.8959
H04	SNORD49A	28.9487	24.5484	29.5865	27.6141	24.2023	26.0095	27.3295	25.3505	25.1575	24.6773	25.6093	25.7137	28.3574	24.8697	23.2268	25.5428	24.5125	24.3195	27.3512	28.5779
H05	hsa-miR-423-5p	26.7731	26.501	28.1844	24.4502	24.7477	27.2266	28.4286	24.9802	25.2518	26.5574	31.3768	24.7361	28.5812	27.16	25.2008	28.4181	25.7015	27.9666	25.9939	27.6383
H06	hsa-miR-7-5p	27.2966	27.2227	28.7491	22.6872	24.7387	27.0969	28.7722	25.9846	25.6443	27.3244	32.5864	25.2972	28.8791	26.673	25.9898	29.0067	26.8093	28.712	25.8488	27.7366
H07	hsa-miR-9-5p	31.5673	31.5068	34.338	21.3159	27.9635	32.9317	35.6403	30.8502	26.2882	31.0888	31.6891	30.9938	34.6224	25.8876	30.7657	34.9264	32.2778	34.5081	30.9562	31.8927
H08	hsa-let-7e-5p	26.837	24.2217	28.8641	24.7252	22.8128	24.8337	28.7171	25.9957	24.188	24.4744	29.4501	25.3297	28.9221	26.937	25.3917	28.3356	26.747	28.0101	25.6771	27.7816
H09	hsa-miR-92b-3p	33.298	21.553	34.9657	30.4547	31.0697	27.8056	31.7896	32.3241	31.3807	32.0285	32.5153	29.7237	33.6233	29.6228	29.92	32.1914	28.9668	31.7417	30.2202	31.4303
H10	hsa-miR-93-5p	23.3768	21.2176	25.3885	19.6879	18.767	21.4434	24.4778	20.5742	19.9638	21.3917	27.44	20.2694	24.3258	22.8181	20.9633	24.6505	22.3835	24.4507	21.6299	23.2324
H11	hsa-miR-99a-5p	27.1339	24.895	29.768	28.1896	22.9383	30.5685	29.9198	24.7275	25.7535	24.9954	32.8331	26.0359	29.9163	28.9394	26.5511	28.9719	27.6941	28.7153	27.932	28.6766
H12	Blank (H2O)	Undetermined	Undetermined	Undetermined	Undetermined	Undetermined	Undetermined	Undetermined	Undetermined	Undetermined	Undetermined	Undetermined	Undetermined	Undetermined	Undetermined	Undetermined	Undetermined	Undetermined	Undetermined	Undetermined	Undetermined
